# Supplementary material for: β1 integrin, ILK and mTOR regulate collagen synthesis in mechanically loaded tendon cells
Source: PubMed Central journal article supplement (PMC7387456; doi:10.1038/s41598-020-69267-6), 2020-07-28

Supplementary table S 1: List of primers used for real time qPCR.

| <b>Gene</b>    | <b>Forward primer</b>       | <b>Reverse primer</b>            |
|----------------|-----------------------------|----------------------------------|
| Mouse Col1a1   | GCTTGAAGACCTATGTGGGTATAA    | GGTGGAGAAAGGAGCAGAAA             |
| Mouse Col3a1   | AGATAAGGGTGAAGGTGGTTCC      | CCTGGTTCACCATTCTGTCC             |
| Mouse Scx 72bp | GAACACCCAGCCCAAACAGA        | CTGTCACGGTCTTTGCTCAAC            |
| Mouse Gapdh    | TCACCACCATGGAGAAGGC         | GCTAAGCAGTTGGTGGTGCA             |
| Human Col1a1   | CACCAATCACCTGCGGTACAGAA     | CAGATCACGTCATCGCACAAAC           |
| Human Col1a2   | AGA GTG GAG CAG TGG TTA CTA | GAT ACA GGT TTC GCC AGT<br>AGA G |
| Human Col3a1   | AATCAGGTAGACCCGGACGA        | TTCGTCCATCGAAGCCTCTG             |
| Human Gapdh    | TCTTTTGCCTCGCCAGCCGAG       | TGACCAGGCGCCCAATACGAC            |

**a**

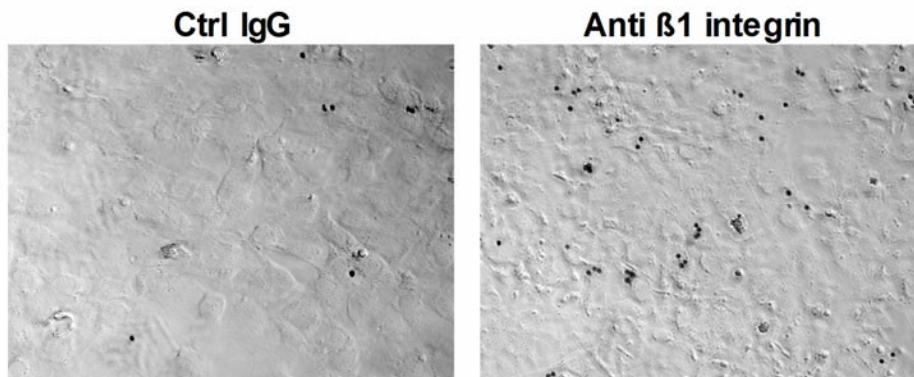

**b**

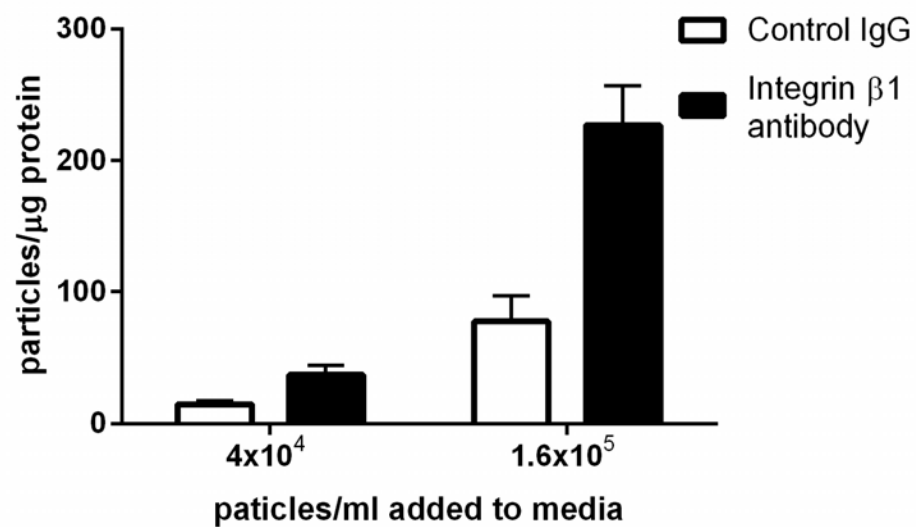

Supplementary figure S1: Specificity of conjugated particles with ITGB1 antibody

- The microscopic micrographs of the cells bound to the particles conjugated with IgG iso control antibody and ITGB1 antibody.
- The number of bound particles in protein lysates which were normalized to total protein concentration.

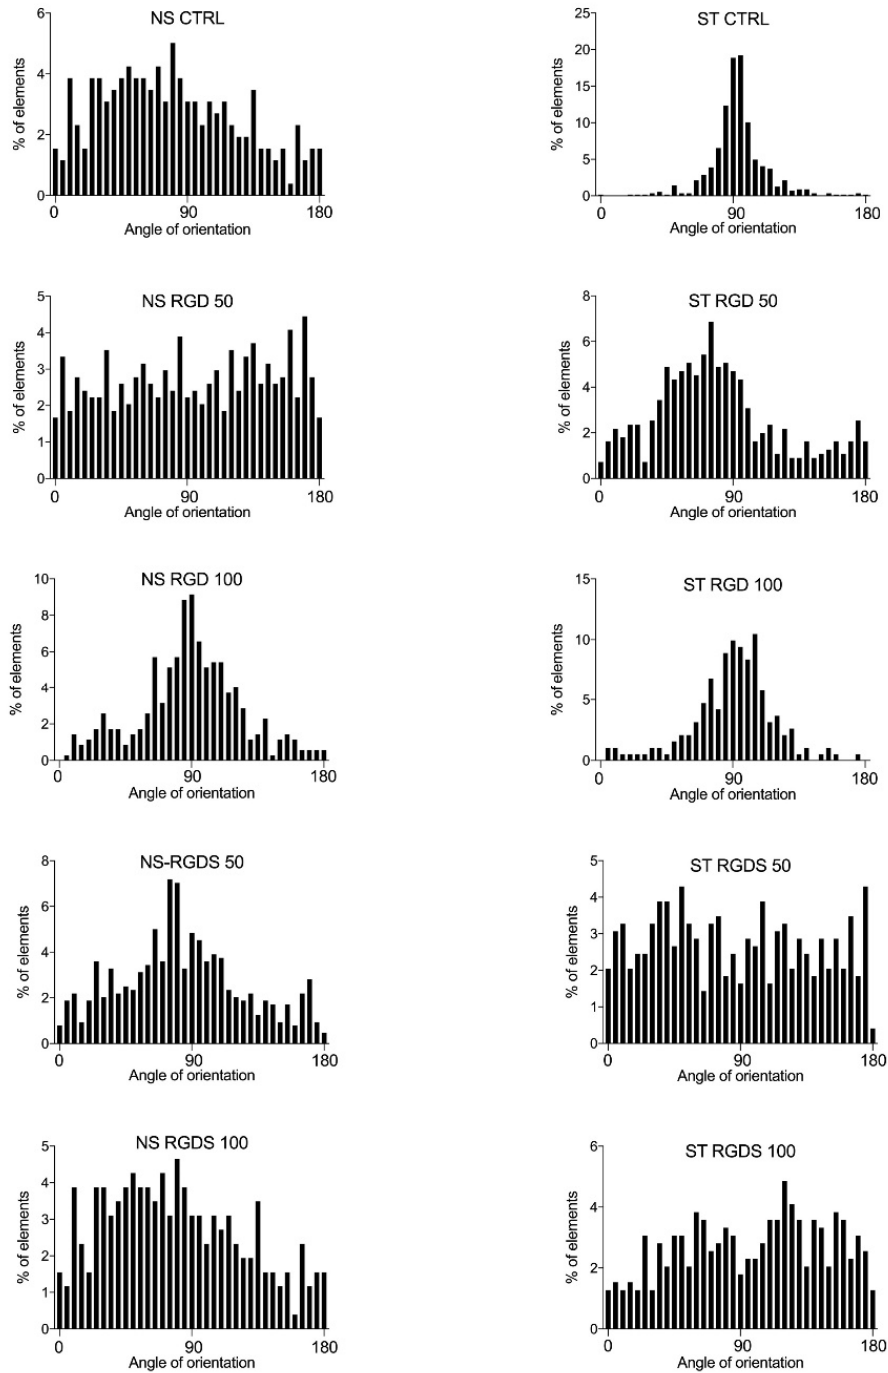

Supplementary figure S2: Plot of alignment of structural features of BATs in Figure 2a

The sum of elements oriented within 5 degrees intervals are represented in a single bar. 90 degrees represents alignment on the major axis of the bioartificial tendon. Left column corresponds to non-stretched condition, right column corresponds to stretched condition.

Supplementary figure S3: Uncropped images of blots used in main figures. Number of the corresponding figure is shown above the panels. Regions used for figures are boxed. Positions of the molecular mass markers are shown as kDa. (\*) indicates residual signal from previous blotting.



**Figure 2(a)**

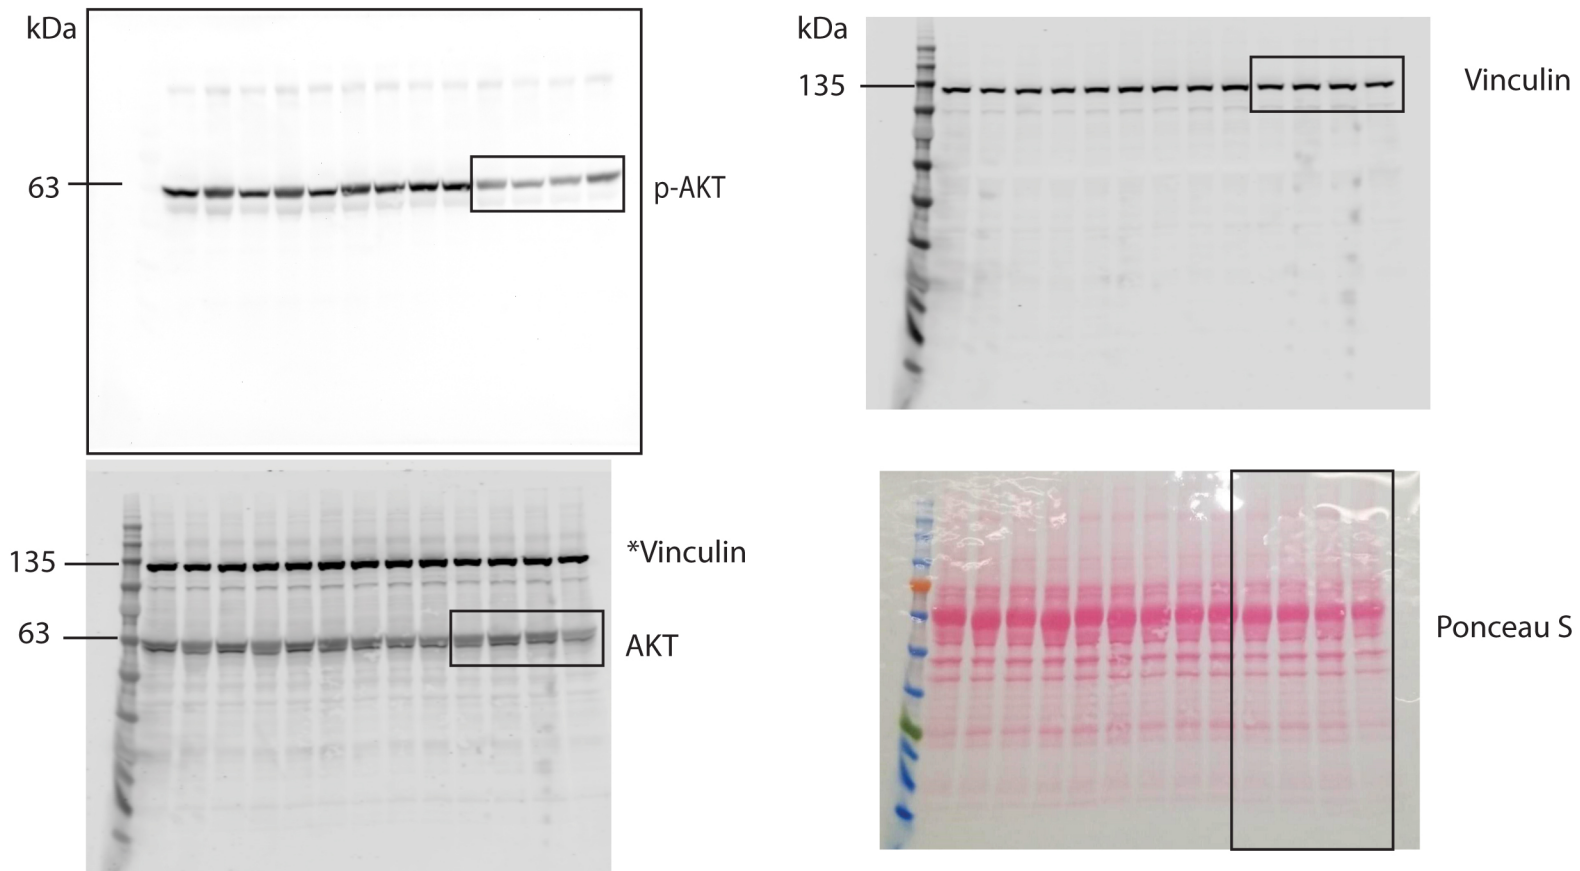

**Figure 2(c)**

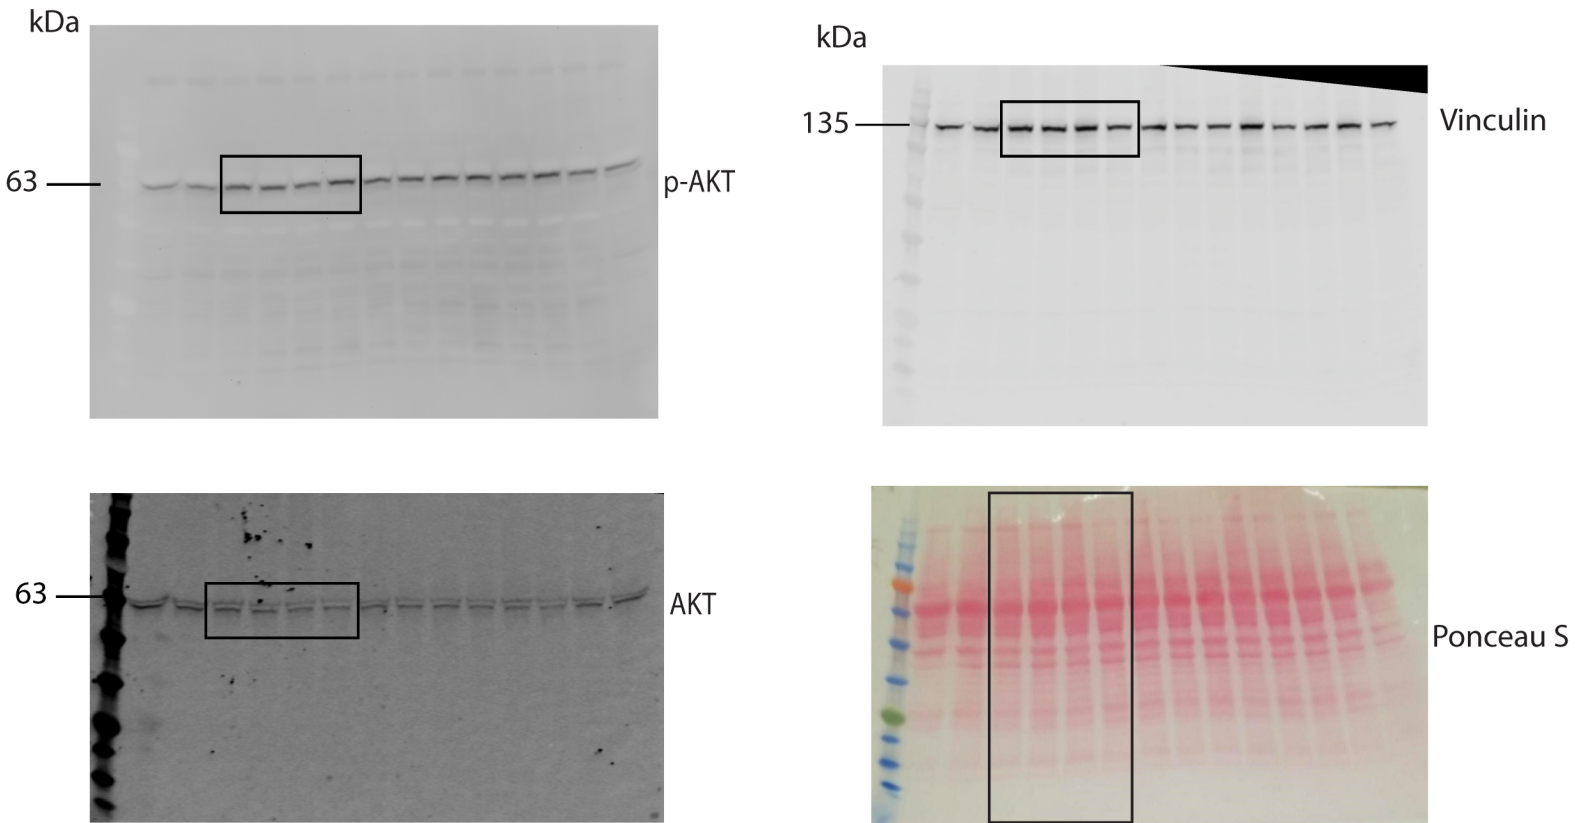

**Figure 2(e)**

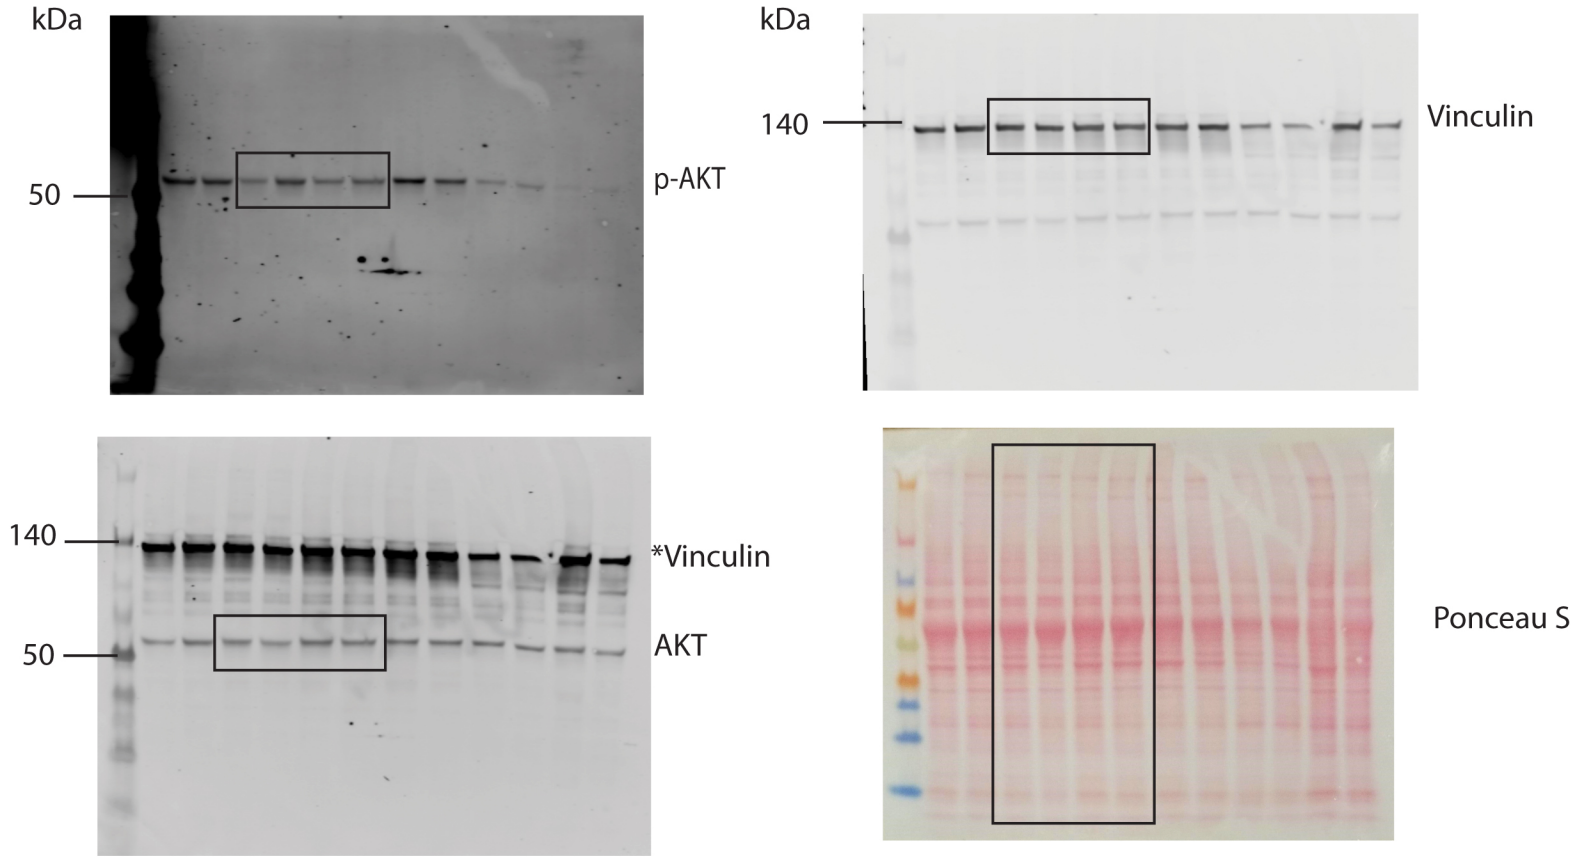

**Figure 2(g)**

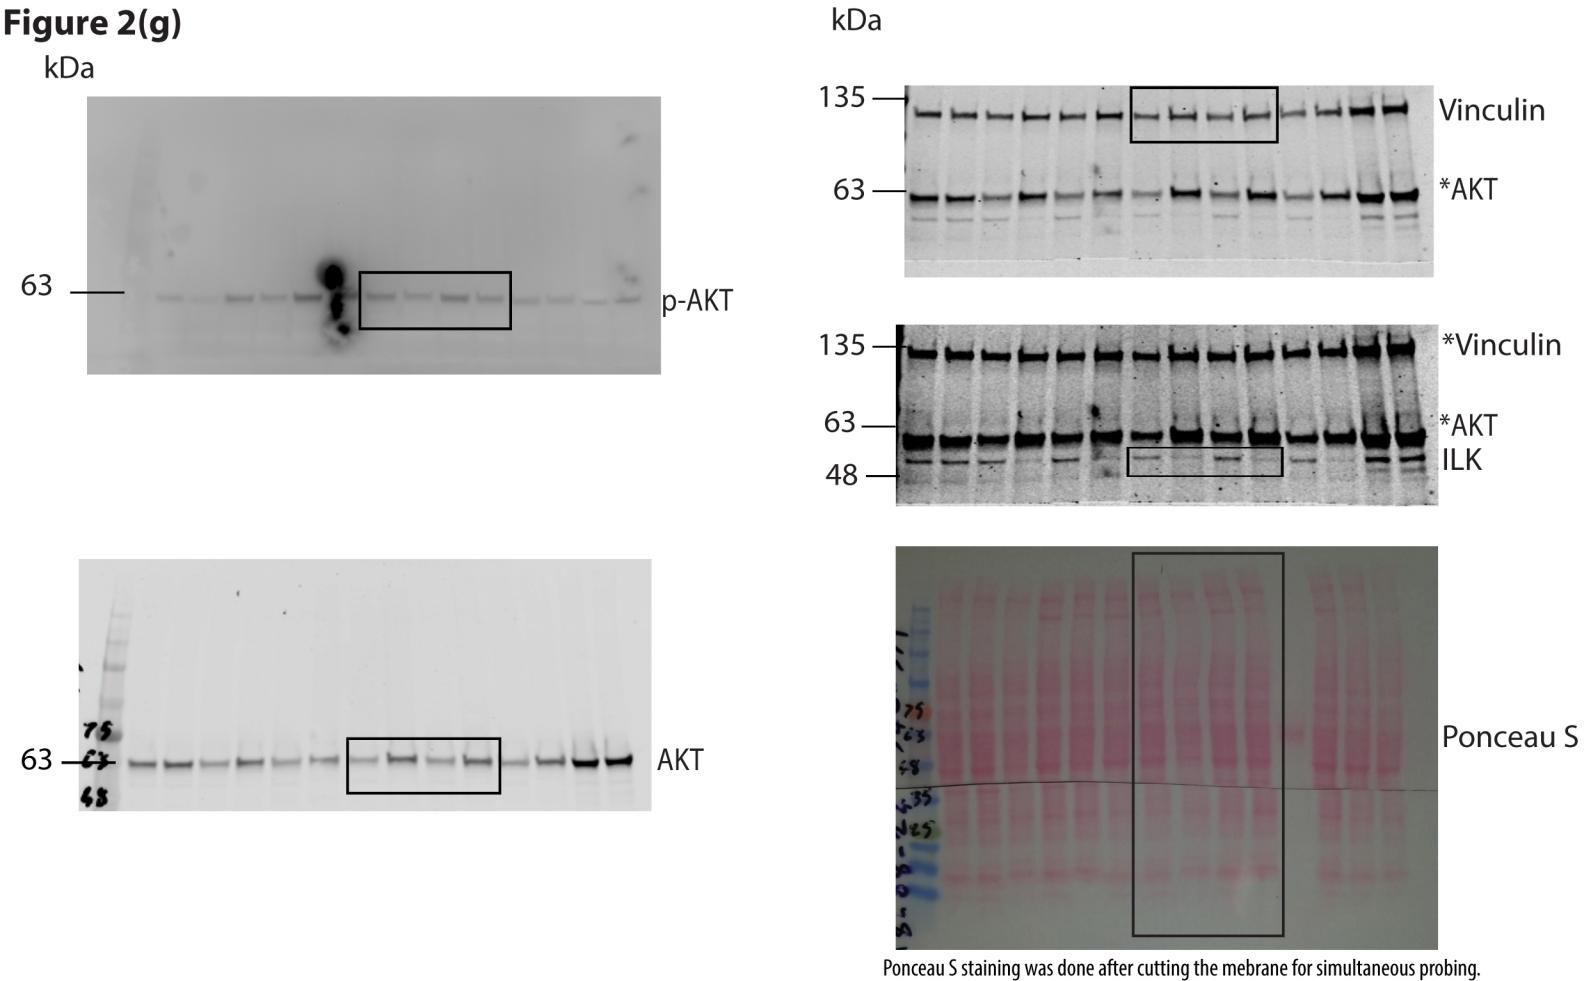

**Figure 3 (human tnedon cells)**

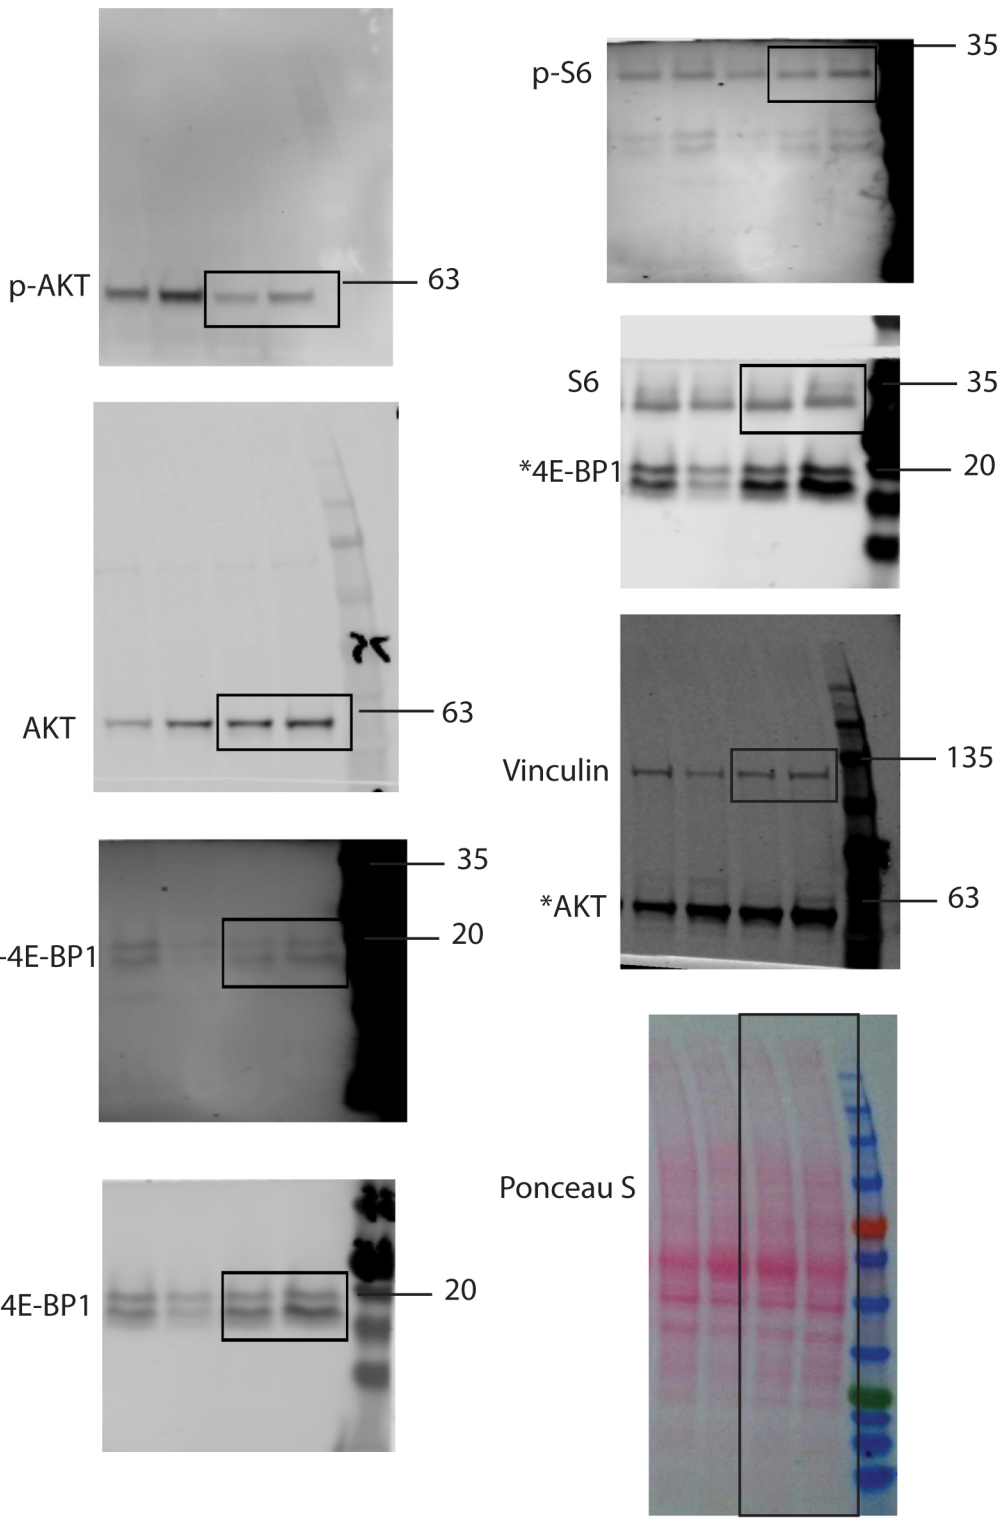



**Figure 4(a) Human tendon cells**

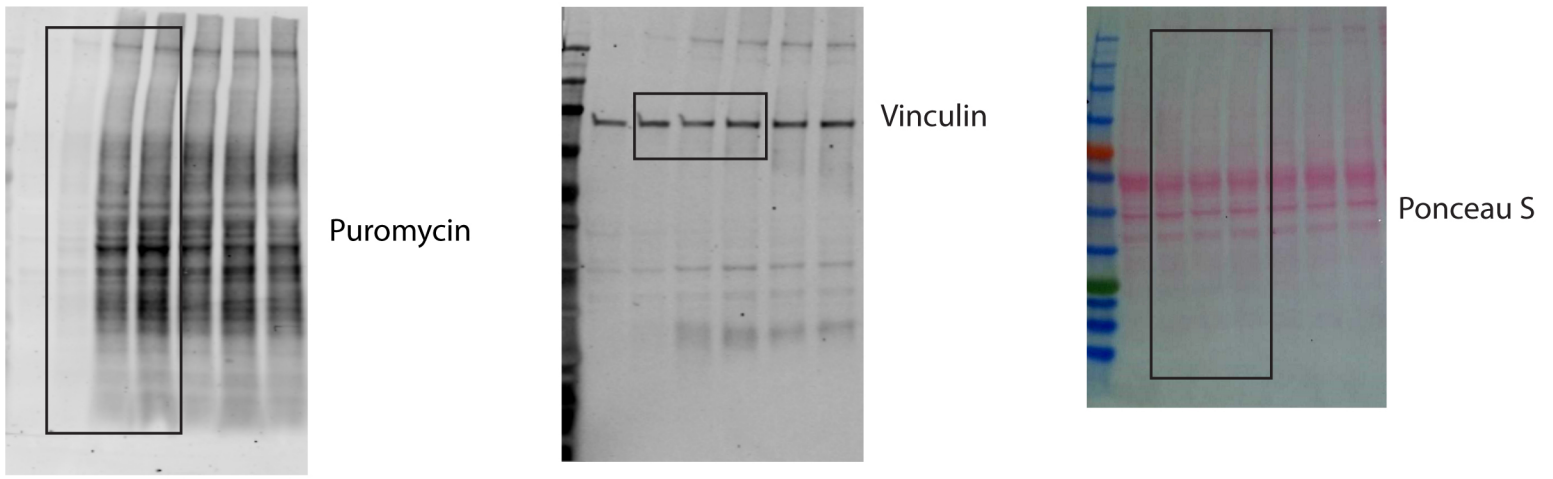

**Figure 4(a) C3H10T1/2 cells**

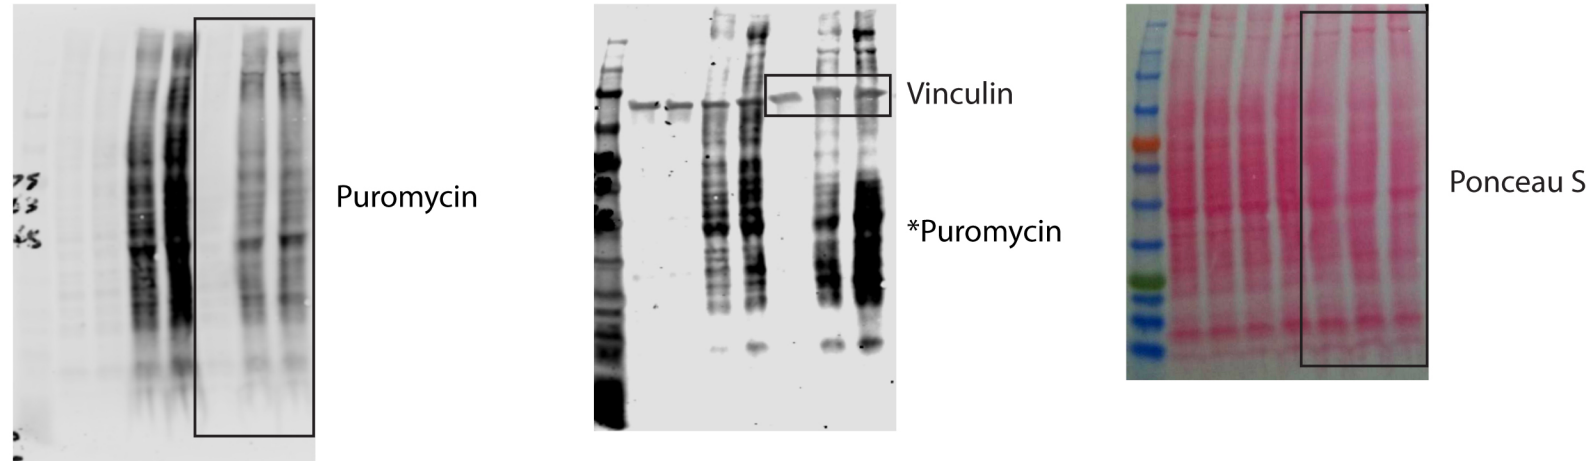

**Figure 4(c)**

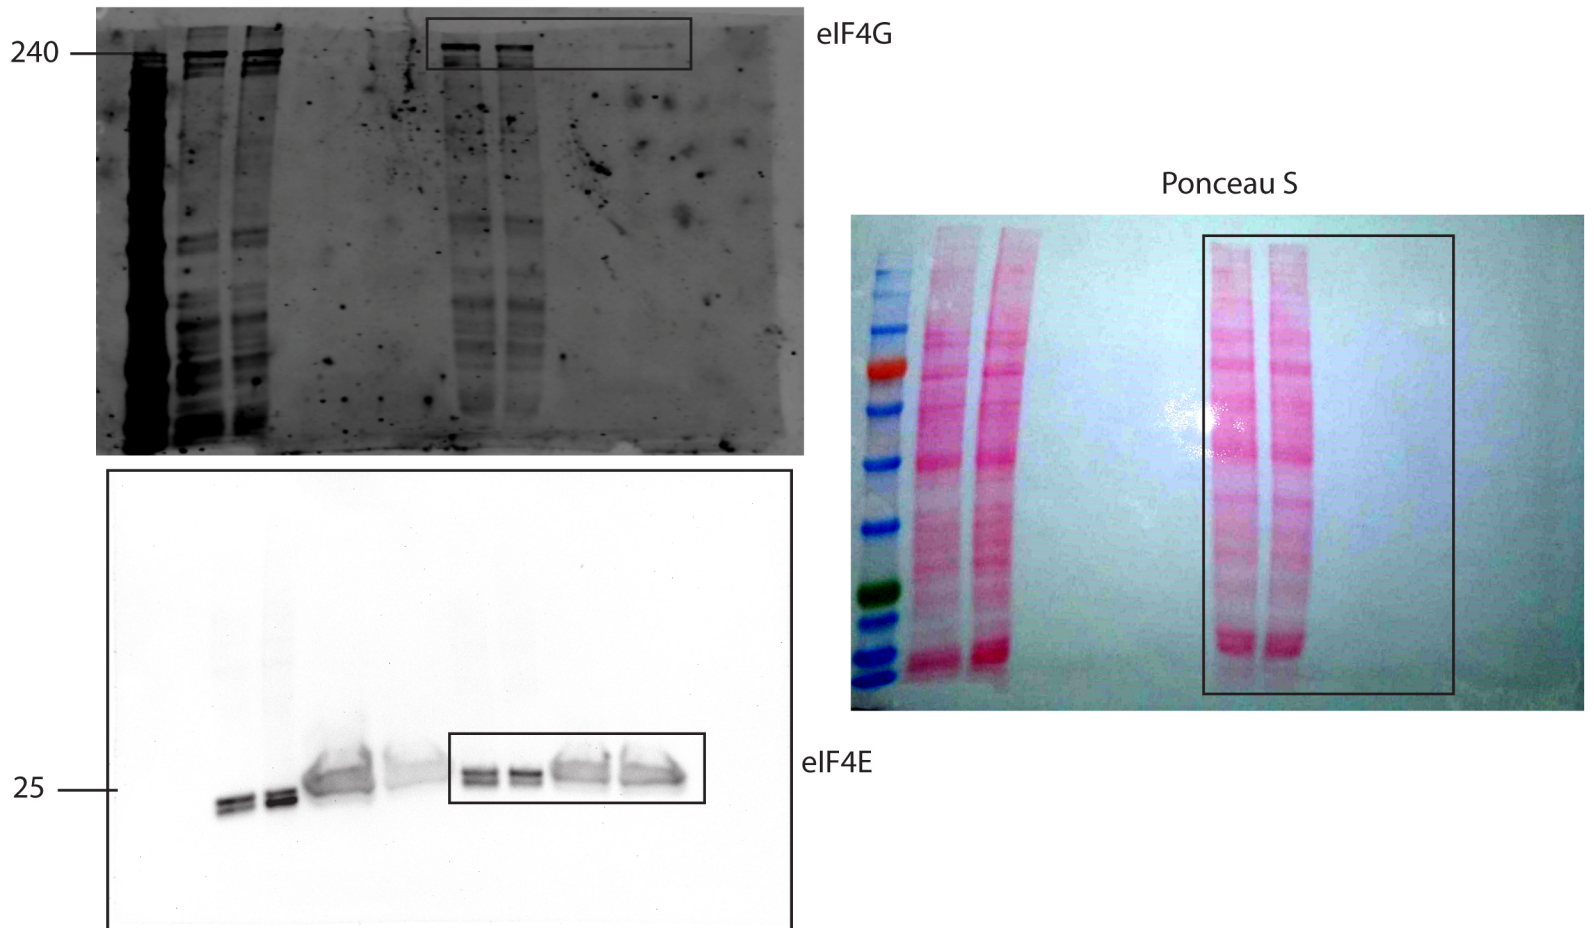

**Figure 3 (C3H10T1/2)**

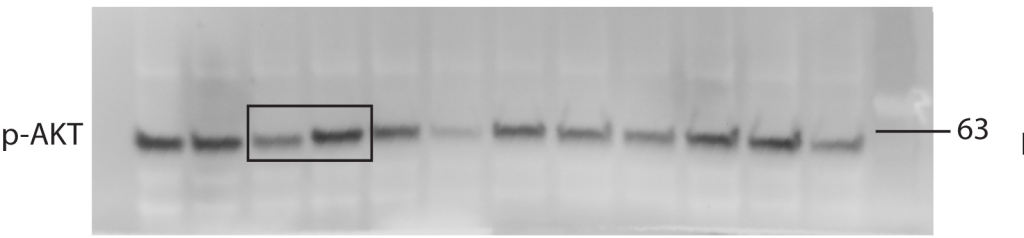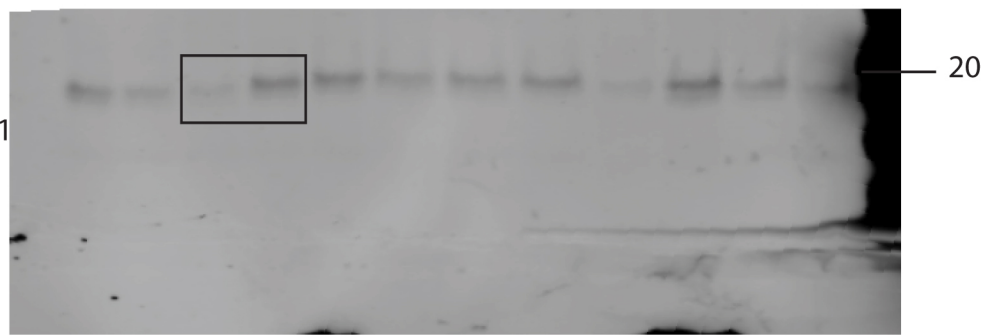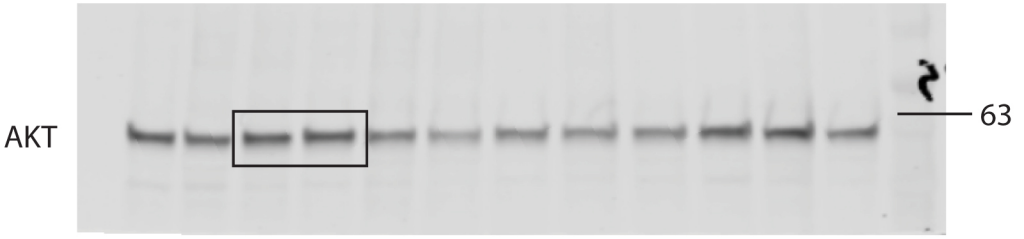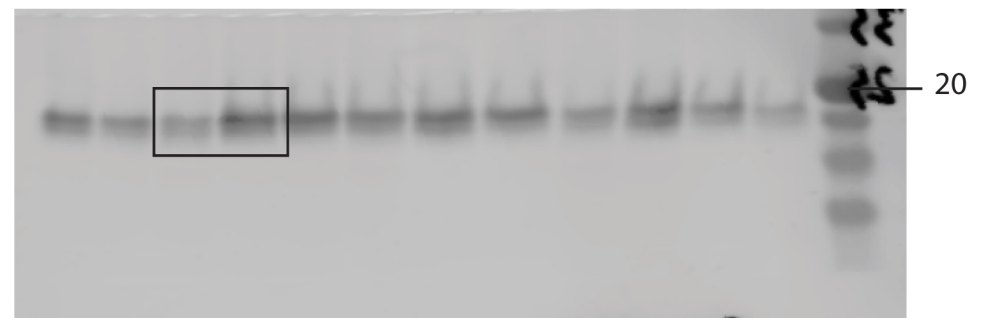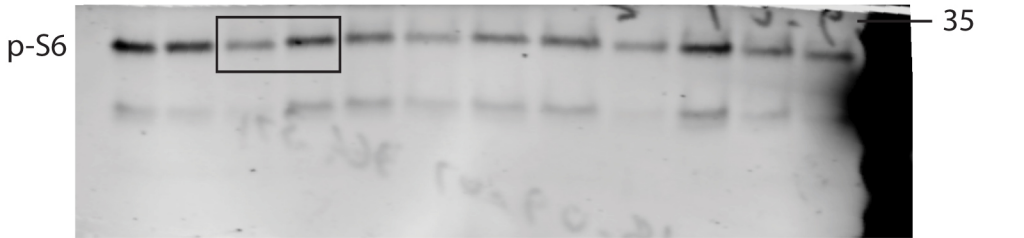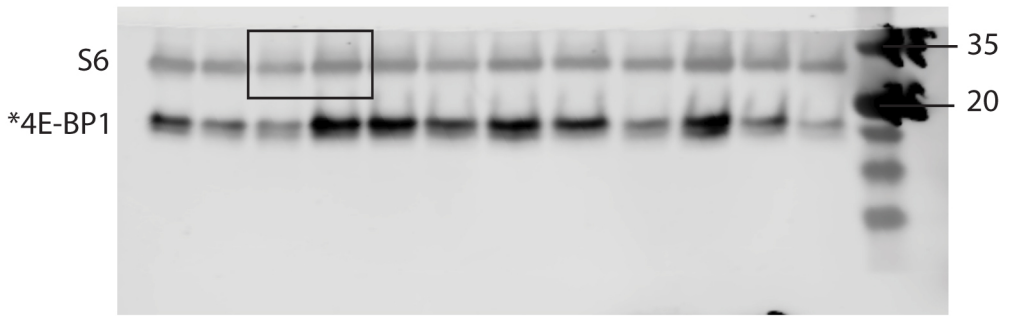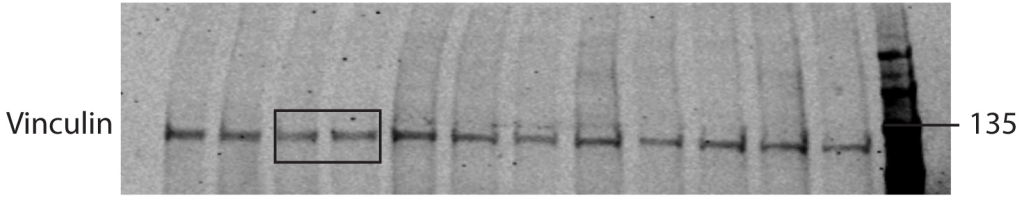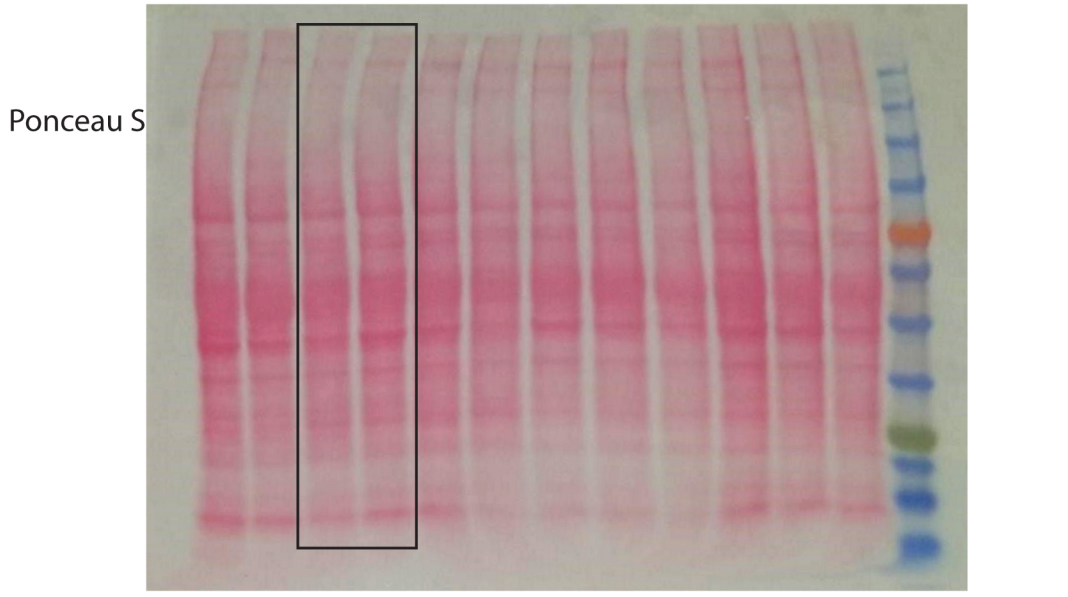

**Figure 5(a) (GSK2141795)**

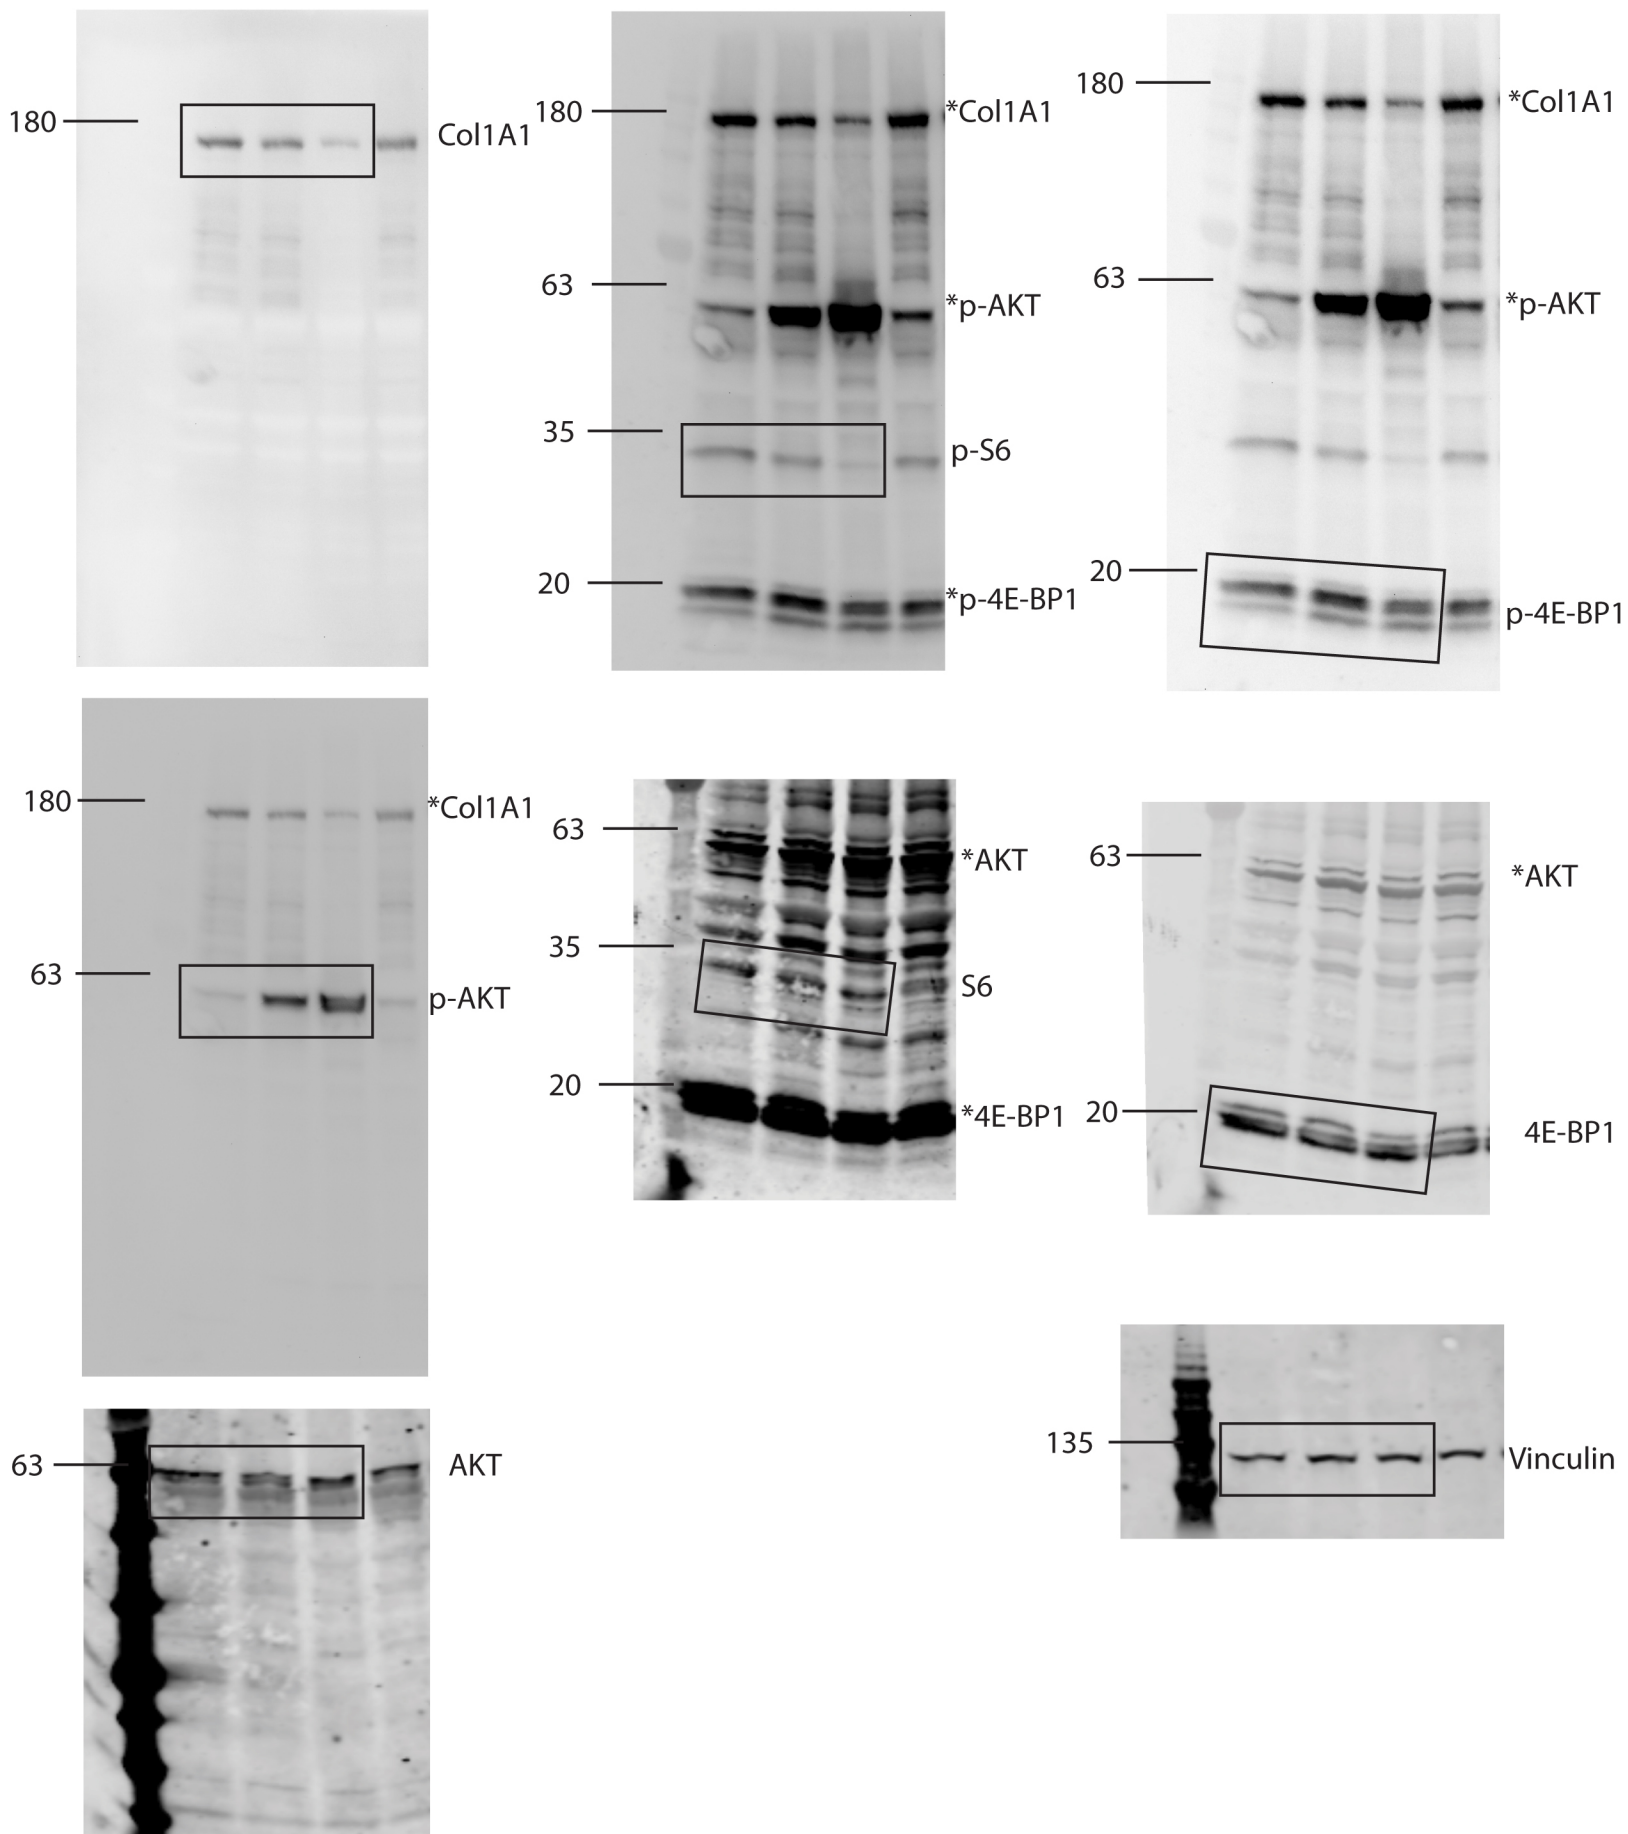



**Figure 5a (mTOR inhibitors)**

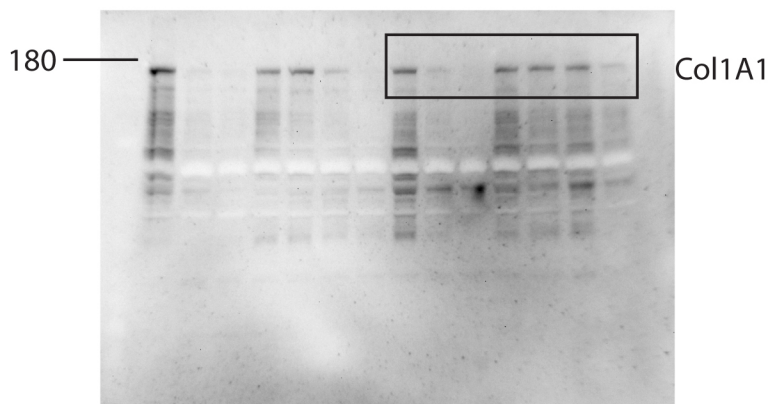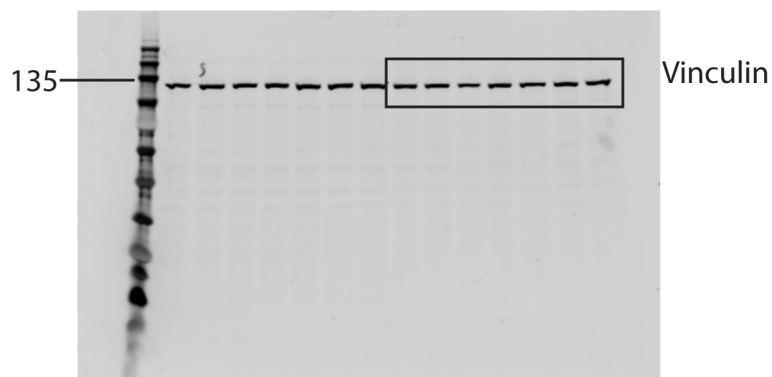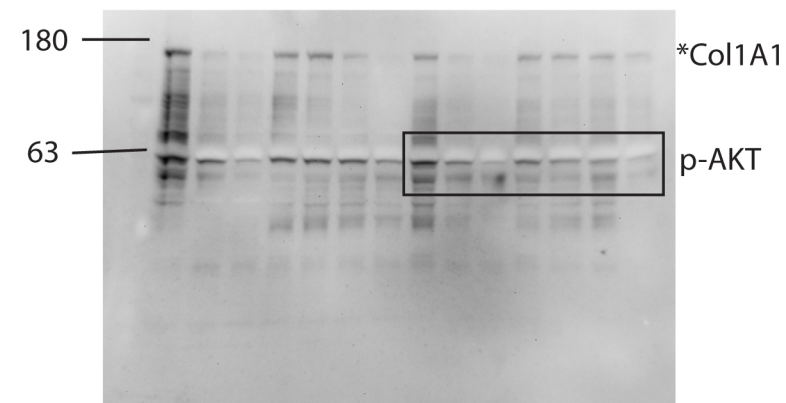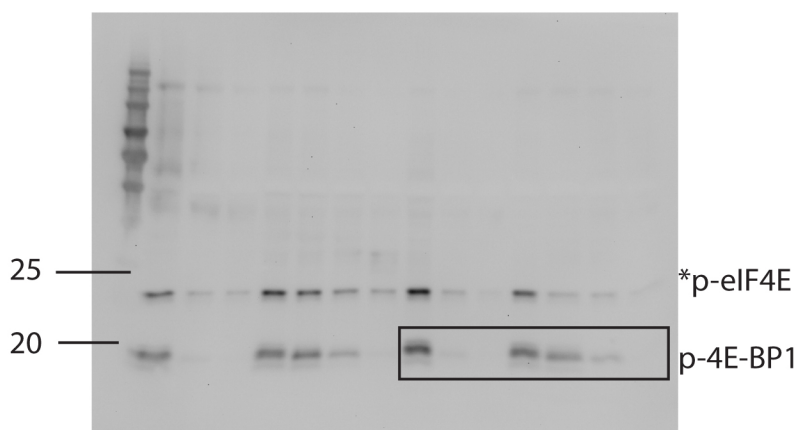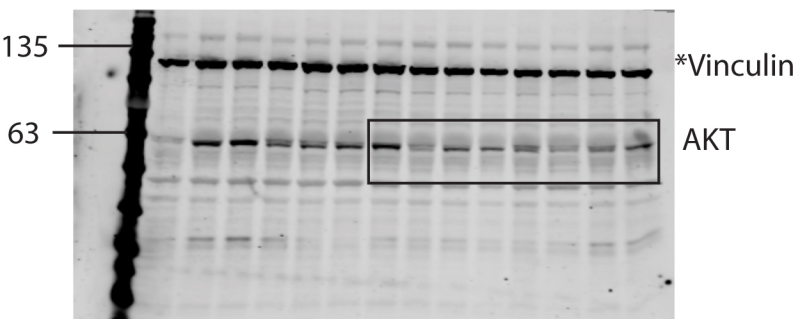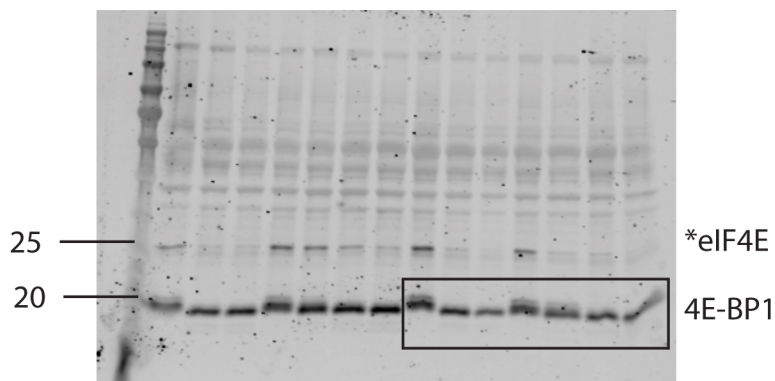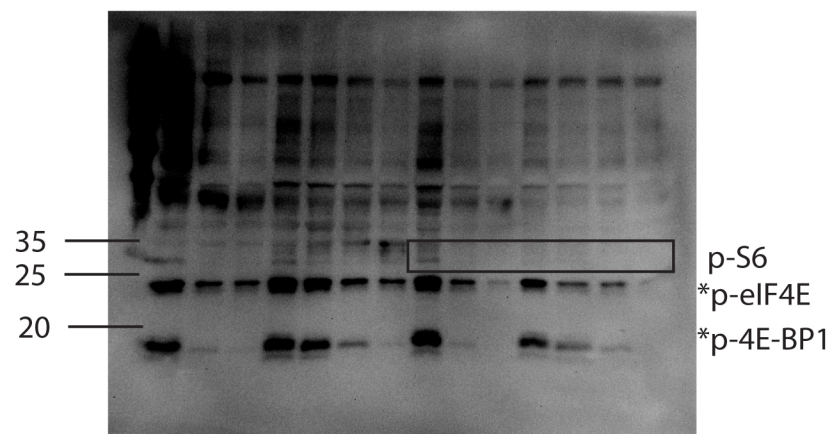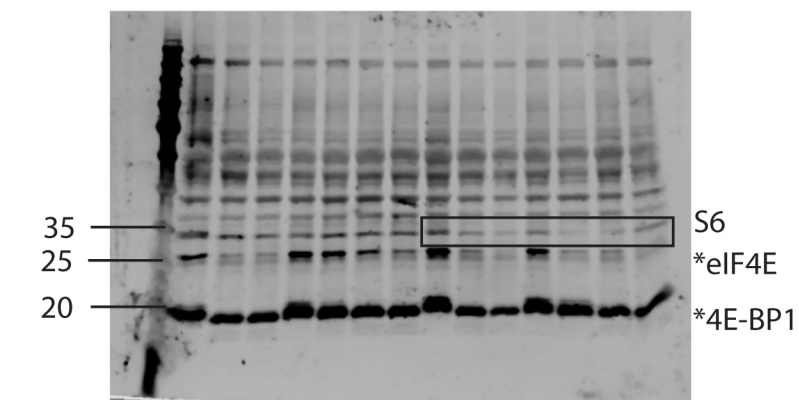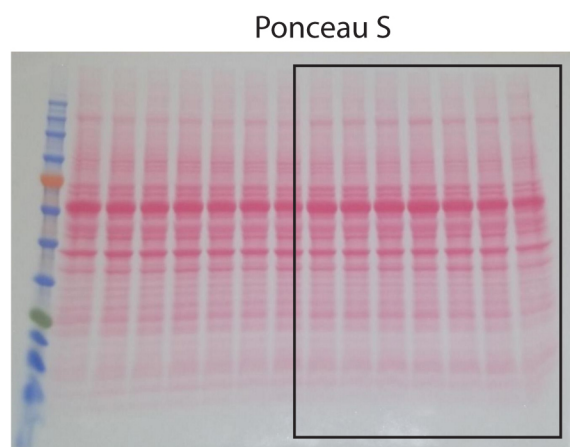

Supplement: 41598_2020_69267_MOESM1_ESM.pdf [file 41598_2020_69267_MOESM1_ESM.pdf]
